# Supplementary material
Source: MDPI journal article supplement (https://www.mdpi.com/2073-4441/11/10/2081)

Article

# Removal of Pb(II) by Pellicle-Like Biofilm-Producing *Methylobacterium hispanicum* EM2 Strain from Aqueous Media

Sun-Wook Jeong<sup>1</sup>, Hyo Kyeong Kim<sup>1</sup>, Jung Eun Yang<sup>2,\*</sup> and Yong Jun Choi<sup>1,\*</sup>

<sup>1</sup> School of Environmental Engineering, University of Seoul, Seoul, 02504, Korea; jeongsunwook@gmail.com (S.-W.J.); kimhk9354@gmail.com (H.K.K.);

<sup>2</sup> World Institute of Kimchi, Gwangju 61755, Korea; junge@wikim.re.kr

\* Correspondence: junge@wikim.re.kr (J.E.Y.); yongjun2165@uos.ac.kr (Y.J.C.); Tel.: +82-62-610-1753 (J.E.Y.); +82-2-6490-2873 (Y.J.C)

**Table S1.** The phenotypic characteristics of *Methylobacterium hispanicum* strain EM2.

| Characteristics                 | <i>Methylobacterium hispanicum</i> EM2 |
|---------------------------------|----------------------------------------|
| Gram staining                   | –                                      |
| Colony color                    | Pink                                   |
| Cell shape                      | Rod                                    |
| Cell length (µm)                |                                        |
| cell length                     | 3.6 (±0.6)                             |
| cell width                      | 0.12 (±0.2)                            |
| Motility                        | +                                      |
| Temperature range (°C)          | 20–40                                  |
| NaCl range (%)                  | 0–1                                    |
| pH range                        | 5–8                                    |
| Production of acid from glucose | –                                      |
| Production of indole            | –                                      |
| Nitrate reduction               | +                                      |
| Enzyme activity                 |                                        |
| catalase                        | +                                      |
| oxidase                         | w                                      |
| arginine dihydrolase            | –                                      |
| urease                          | +                                      |
| β-glucosidase                   | –                                      |
| β-galactosidase                 | –                                      |
| protease                        | –                                      |
| Assimilation                    |                                        |
| D-glucose                       | –                                      |
| L-arabinose                     | –                                      |
| D-mannose                       | –                                      |
| D-mannitol                      | –                                      |
| N-acetyl-glucosamine            | –                                      |
| D-maltose                       | –                                      |
| potassium gluconate             | +                                      |
| capric acid                     | –                                      |
| adipic acid                     | –                                      |
| maleic acid                     | +                                      |
| trisodium citrate               | +                                      |
| phenyl acetic acid              | –                                      |

w, weak; –, negative; +, positive

**Table S2.** Pb(II) removal from sewage water by the EM2 strain.

| Metals<br>in Sewage Water | EM2 Treatment      |                    | Removal Efficiency (%) |
|---------------------------|--------------------|--------------------|------------------------|
|                           | before             | after              |                        |
| Pb(II)                    | 9.61 ± 0.07 mg/L   | 0.279 ± 0.1 mg/L   | 97.1                   |
| Ni(II)                    | 20.67 ± 0.23 µg/L  | 13.86 ± 0.07 µg/L  | 32.9                   |
| Co(II)                    | 4.96 ± 1.1 µg/L    | N.D*               | -                      |
| Zn(II)                    | 238.82 ± 2.43 µg/L | 132.24 ± 5.23 µg/L | 44.6                   |
| Cd(II)                    | 0.461 ± 0.042 µg/L | N.D                | -                      |

\*N.D; not determined

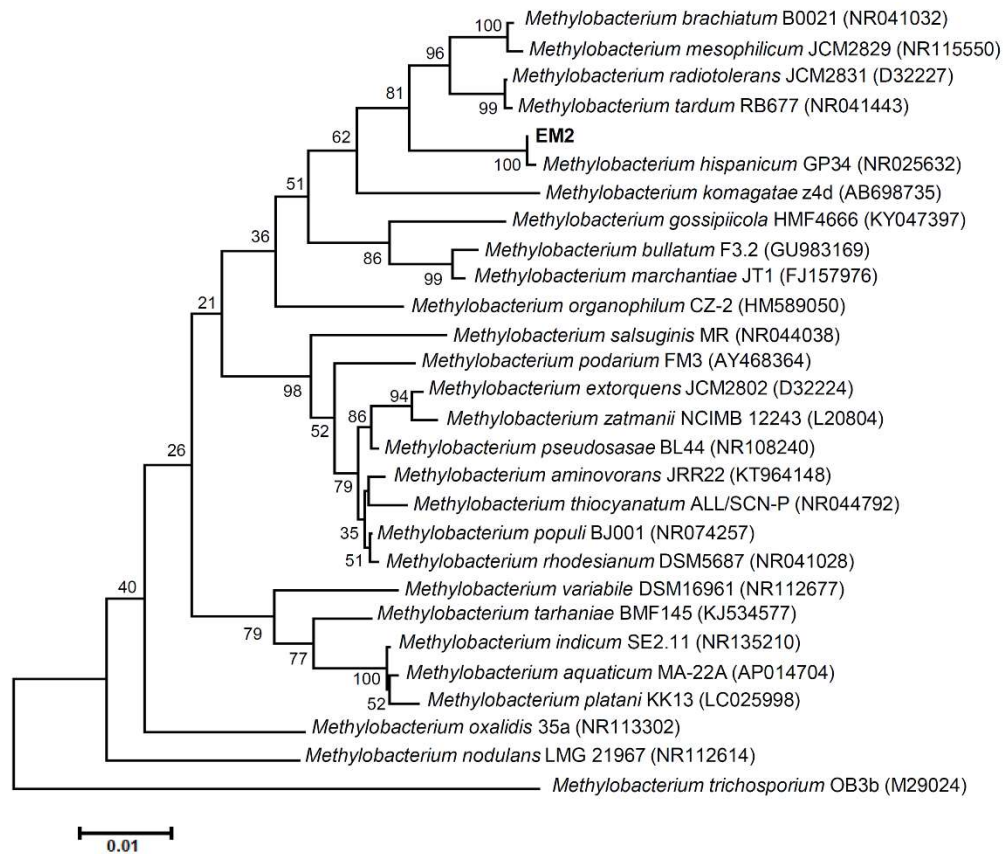

**Figure S1.** Phylogenetic based on 16S rRNA sequences, showing the relationships between *Methylobacterium hispanicum* strain EM2 and other members of the genus *Methylobacterium*. The numbers at the nodes indicate the level of bootstrap support based on the neighbor-joining analysis of 1000 replicates. Accession numbers are given in parenthesis. Bar, 0.01 substitutions per nucleotide position.

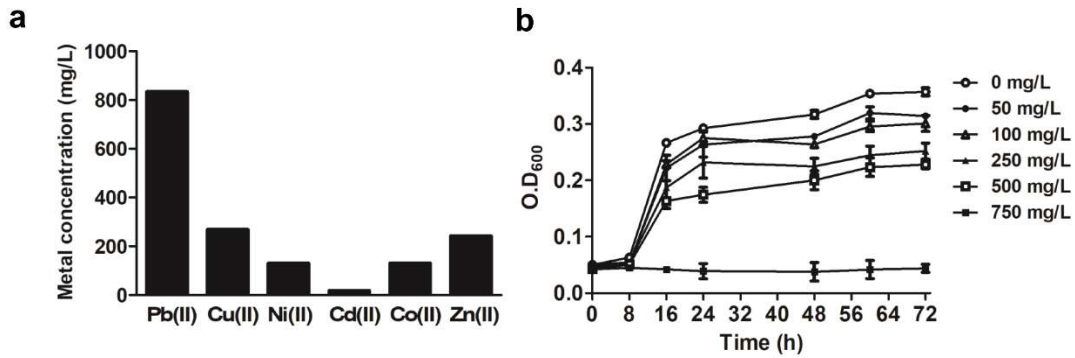

**Figure S2.** Investigation of the resistance of the EM2 strain to different metals. (a) Analysis of the minimal inhibitory concentrations (MICs) of various metal ions. (b) Growth profile of the EM2 strain under different PbCl<sub>2</sub> concentrations. The values and error bars represent the means ± standard deviation (n = 3).

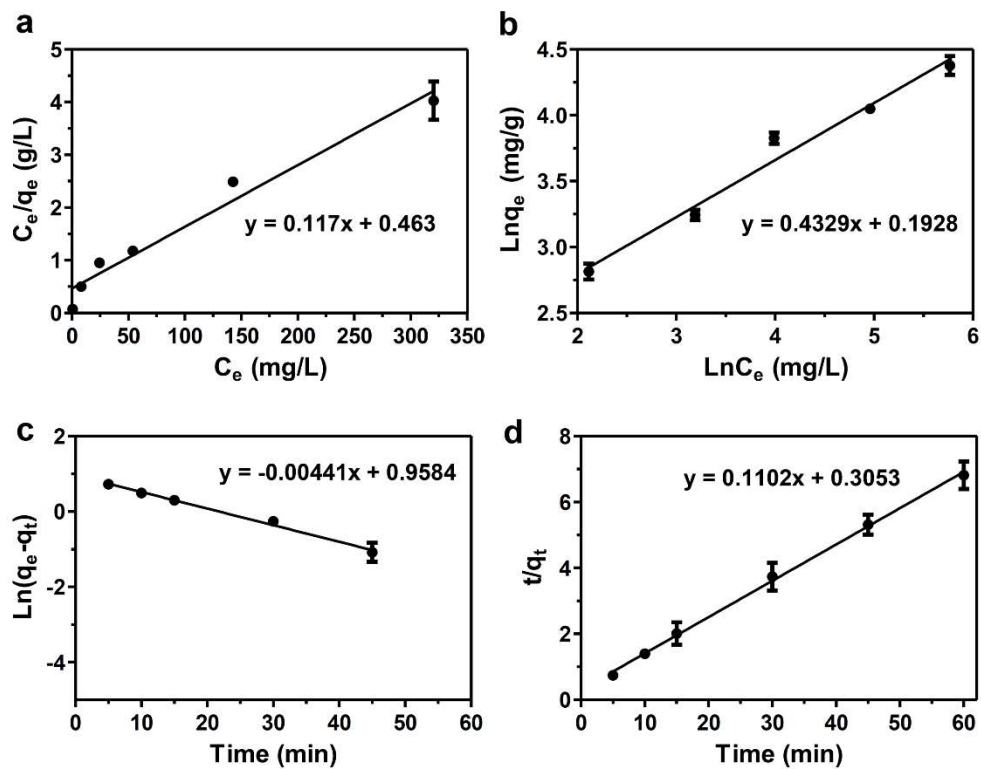

**Figure S3.** Linearization plots of modelling biosorption isotherms and kinetics of EM2 strain. (a) Langmuir, (b) Freundlich isotherm, (c) pseudo-first order, and (d) pseudo-second order. Values and error bars represent means ± SD (n = 3).

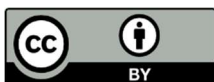

Supplement: s1 [file s1]
